# Supplementary material for: Phosphine–olefin ligands: a facile dehydrogenative route to catalytically active rhodium complexes
Source: Royal Society of Chemistry journal article supplement (doi:10.1039/b608129k), 2006-01-01
Supplement: b608129k.pdf [file b608129k.pdf]

## **Phosphine-Olefin Ligands: A Facile Dehydrogenative Route to Catalytically Active Rhodium Complexes**

**Thomas M. Douglas, Jérôme Le Nôtre, Simon K. Brayshaw, Christopher G. Frost\* and Andrew S. Weller\***

Fig. S.1.  $^{31}\text{P}\{^1\text{H}\}$  NMR spectra for **(dppe)RhCl(P(C<sub>5</sub>H<sub>9</sub>)<sub>3</sub>)Cl** and **1**.

Fig. S.2.  $^1\text{H}$  and  $^{31}\text{P}$  NMR spectra for **3**.

Fig. S.3.  $^1\text{H}$  NMR spectra of **5** (298 K and 220 K).

Experimental details for compound synthesis, characterisation and catalytic studies.

Crystal structure data for **1**, **2** and **3**.

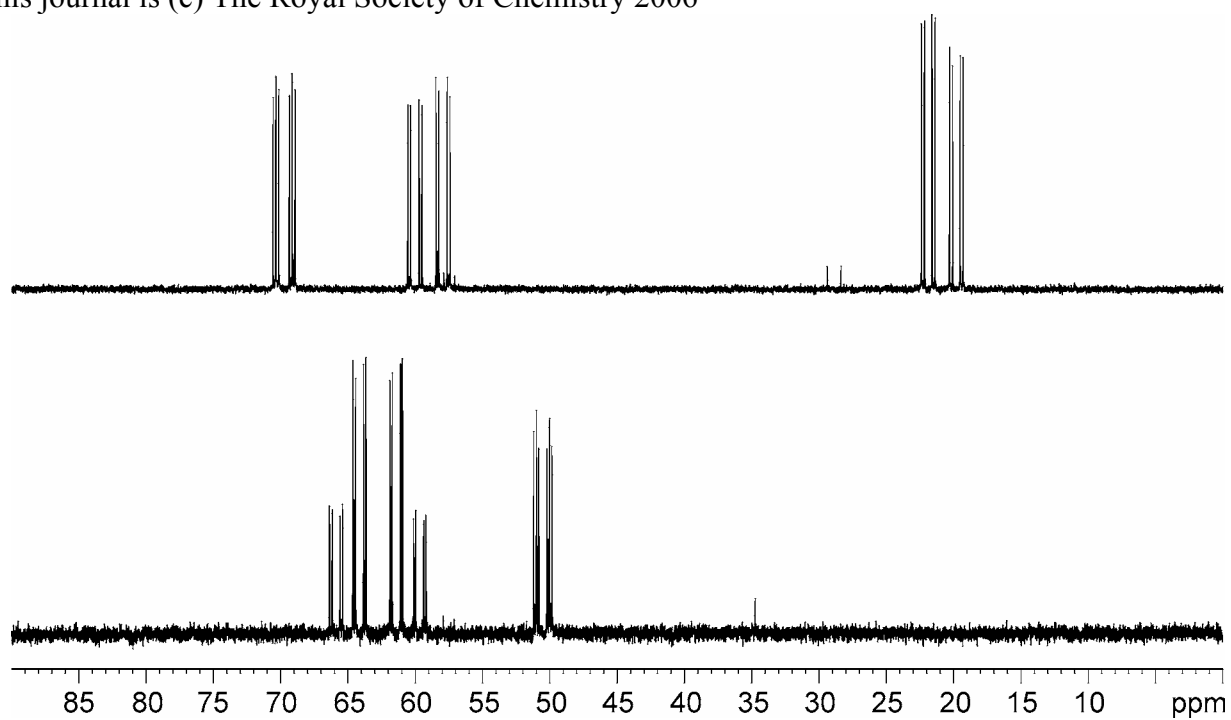

**Fig. S.1**  $^{13}\text{P}$   $\{^1\text{H}\}$  NMR spectra of  $(\text{dppe})\text{Rh}(\text{P}(\text{C}_5\text{H}_9)_3)\text{Cl}$  (upper) and **1** (lower).

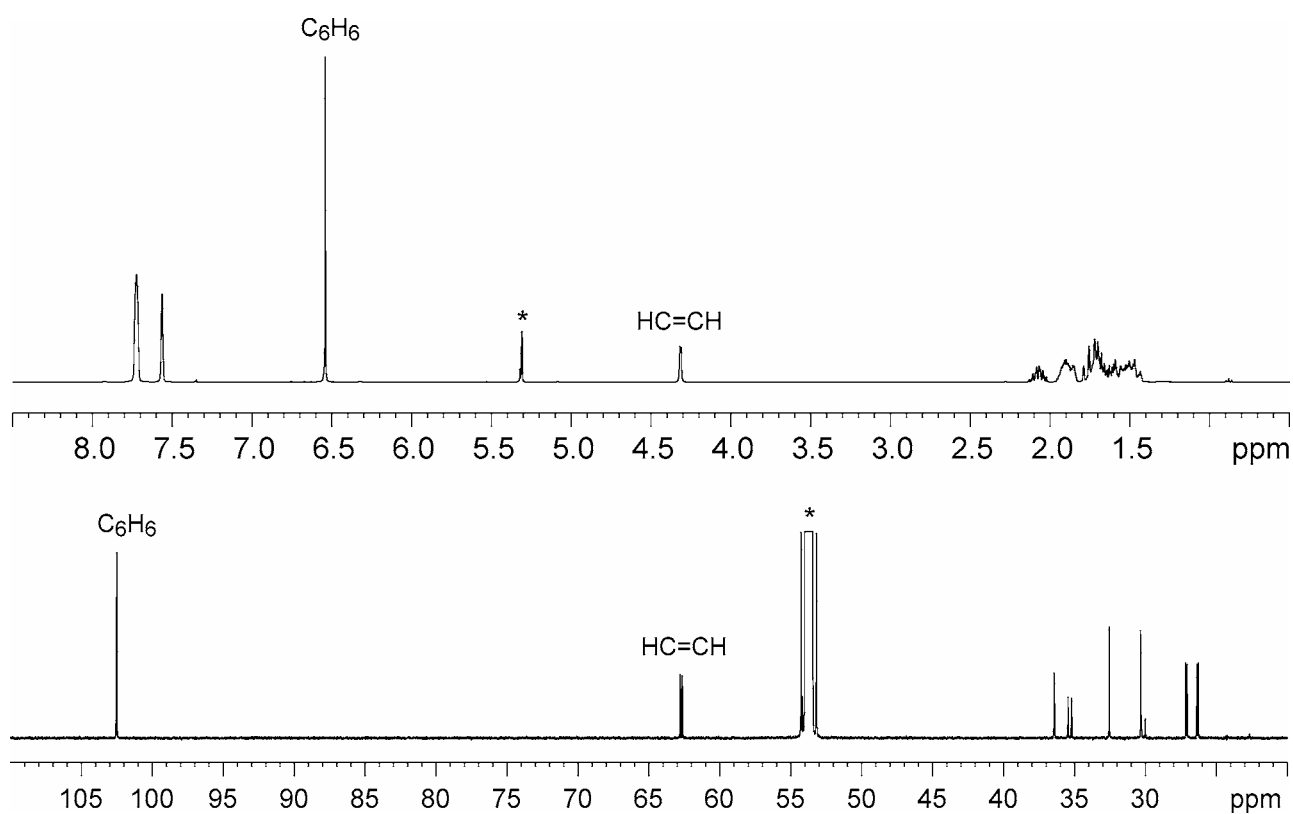

**Fig. S.2**  $^1\text{H}$  (upper) and  $^{13}\text{C}$   $\{^1\text{H}\}$  (lower) NMR spectra of **3**.

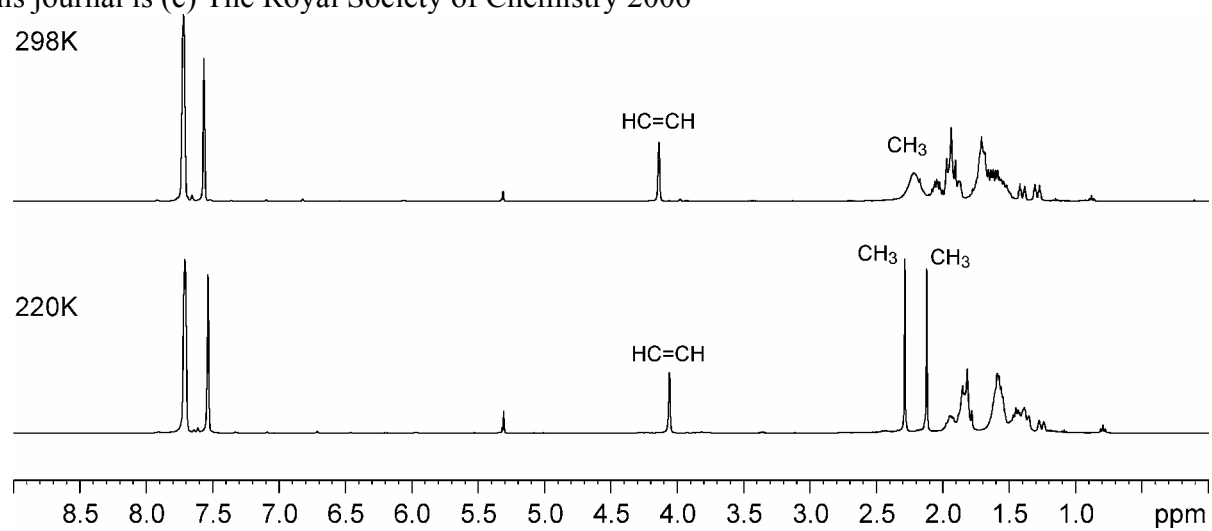

$^1\text{H}$  NMR spectra of **5** at 298K (upper) and 220K (lower).

### **General**

All manipulations were carried out under an atmosphere of argon, using standard Schlenk line and glove box techniques, unless otherwise stated. Glassware was pre-dried in an oven at 130°C and flamed with a blowtorch under vacuum prior to use. Solvents were dried over activated alumina, copper or molecular sieve columns using a MBraun solvent purification system and stored under argon in ampoules equipped with Young's taps. CD<sub>2</sub>Cl<sub>2</sub> and fluorobenzene was distilled under vacuum from CaH<sub>2</sub>. Flash chromatography was carried out using Fisher silica 60A (35-70 micron). TLC was performed using Alugram® silica G/UV<sub>254</sub> coated plates. [Rh(nbd)Cl]<sub>2</sub><sup>1</sup> and Rh(nbd)(P(C<sub>5</sub>H<sub>9</sub>)<sub>3</sub>)Cl<sup>2</sup> were prepared using literature methods. All other chemicals were used as received from Aldrich, Strem, Fisher Scientific (Acros), Lancaster. Microanalyses were performed by Elemental Microanalysis Ltd, Devon, UK.

### **NMR spectroscopy**

<sup>1</sup>H, <sup>31</sup>P{<sup>1</sup>H} and <sup>13</sup>C{<sup>1</sup>H} NMR spectra were recorded on Brüker Avance 300MHz or 400MHz spectrometers. Residual protio solvent was used as reference for <sup>1</sup>H NMR spectra. <sup>13</sup>C spectra were referenced to the perdeuterio-solvent resonance. <sup>1</sup>H and <sup>13</sup>C spectra in C<sub>6</sub>H<sub>5</sub>F were referenced against the solvent signal which was in turn referenced to an external sample of tetramethylsilane. <sup>31</sup>P{<sup>1</sup>H} spectra were referenced against 85% H<sub>3</sub>PO<sub>4</sub> (external). Values are quoted in ppm. Coupling constants are quoted in Hz.

### **X-Ray crystallography**

Hemispheres of data for **1**, **2** and **3** were collected at 150K a Nonius KappaCCD diffractometer at 150 K, using graphite-monochromated Mo K $\alpha$  radiation ( $\lambda$  = 0.71073 Å). Data were processed using the supplied Nonius software. Structure solution, followed by full-matrix least squares refinement, was performed using the WinGX-1.70 suite of programs throughout. In each structure, several of the CF<sub>3</sub> groups in the anion were disordered in the ratios:

### **Rh(dppe)(P(C<sub>5</sub>H<sub>9</sub>)<sub>3</sub>)Cl**

A solution of 1,2-bis(diphenylphosphino)ethane (42.5 mg, 0.11 mmol) in CH<sub>2</sub>Cl<sub>2</sub> (5 mL) was added dropwise to a J.Youngs flask containing a stirred solution of Rh(NBD)(P(C<sub>5</sub>H<sub>9</sub>)<sub>3</sub>)Cl (50 mg, 0.11mmol) in CH<sub>2</sub>Cl<sub>2</sub> (5 mL). The resulting yellow solution was stirred for 30 minutes after which

the solvent was removed *in vacuo*. The residue was washed with pentane (5 mL) to give (dppe)Rh(P(C<sub>5</sub>H<sub>9</sub>)<sub>3</sub>)Cl as a yellow powder (60 mg, 72%).

**<sup>1</sup>H NMR (400.13 MHz, CD<sub>2</sub>Cl<sub>2</sub>):** δ 7.96-7.88 (m, 4H, ArH), 7.85-7.77 (m, 4H, ArH), 7.44-7.29 (m, 12H ArH), 2.2-1.2 (m, 31H, CH/CH<sub>2</sub>).

**<sup>31</sup>P{<sup>1</sup>H} NMR (161.98 MHz, CD<sub>2</sub>Cl<sub>2</sub>):** δ 69.80 [ddd, *J*(RhP) 196 Hz, *J*(PP) 36 Hz, *J*(PP) 33 Hz], 59.03 [ddd, *J*(PP) 338 Hz, *J*(RhP) 134, *J*(PP) 33 Hz], 20.87 [ddd, *J*(PP) 338 Hz, *J*(RhP) 128 Hz, *J*(PP) 36 Hz].

**Microanalysis:** C<sub>41</sub>H<sub>51</sub>ClP<sub>3</sub>Rh·0.2 CH<sub>2</sub>Cl<sub>2</sub> requires: C, 62.47; H, 6.54. Found: C, 62.45; H, 6.50.

**[Rh(dppe)-η<sup>2</sup>-(P(C<sub>5</sub>H<sub>9</sub>)<sub>2</sub>(C<sub>5</sub>H<sub>7</sub>))][BAr<sup>F</sup><sub>4</sub>] (1)**

A mixture of Rh(dppe)(P(C<sub>5</sub>H<sub>9</sub>)<sub>3</sub>)Cl (30 mg, 3.87 x 10<sup>-2</sup> mmol) and Na(BAr<sup>F</sup><sub>4</sub>) (34 mg, 3.87 x 10<sup>-2</sup> mmol) in CH<sub>2</sub>Cl<sub>2</sub> (5 mL) was stirred for 15 minutes. The resulting orange mixture was filtered and the solvent was removed *in vacuo*. Diffusion of pentane into a solution of the residue in C<sub>6</sub>H<sub>5</sub>F gave **1** as orange crystals (38 mg, 61%).

**<sup>1</sup>H NMR (400.13 MHz, CD<sub>2</sub>Cl<sub>2</sub>):** δ 7.72 (m, 8H, BAr<sup>F</sup><sub>4</sub>), 7.55 (s, 4H, BAr<sup>F</sup><sub>4</sub>), 7.70-7.45 (m, 20H, ArH), 4.89 (m, 2H, HC=CH), 2.2-1.2 (m, 27H, CH/CH<sub>2</sub>).

**<sup>31</sup>P{<sup>1</sup>H} NMR (161.98 MHz, CD<sub>2</sub>Cl<sub>2</sub>):** δ 65.03 [ddd, *J*(PP) 283 Hz, *J*(RhP) 125, *J*(PP) 31 Hz], 60.55 [ddd, *J*(PP) 283 Hz, *J*(RhP) 125 Hz, *J*(PP) 28 Hz], 50.53 [ddd, *J*(RhP) 158 Hz, *J*(PP) 31 Hz, *J*(PP) 28 Hz].

**<sup>13</sup>C{<sup>1</sup>H} NMR (100.61, CD<sub>2</sub>Cl<sub>2</sub>):** δ 162.10 [q, *J*(BC) 50 Hz, BAr<sup>F</sup><sub>4</sub>], 135.14 (s, BAr<sup>F</sup><sub>4</sub>), 133.44 [d, *J*(PC) 12 Hz, Ar CH], 133.24 [d, *J*(PC) 11 Hz, Ar CH], 133.23 [d, *J*(PC) 41 Hz, Ar CH], 131.87 [d, *J*(PC) 11 Hz, Ar CH], 131.85 [d, *J*(PC) 11 Hz, Ar CH], 131.33 [dd, *J*(PC) 37 Hz, *J*(RhC) 3.5 Hz, Ar CH], 129.71 [d, *J*(PC) 9.3 Hz, Ar CH], 129.46 [d, *J*(PC) 10 Hz, Ar CH], [q, *J*(FC) 31 Hz, BAr<sup>F</sup><sub>4</sub>], 124.94 [q, *J*(FC) 272 Hz, BAr<sup>F</sup><sub>4</sub>], 117.79 (s, BAr<sup>F</sup><sub>4</sub>), 96.21 [t, *J* 9.7 Hz, HC=CH], 37.75 [d, *J*(PC) 7.5 Hz, CH<sub>2</sub>], 35.52 [d, *J*(PC) 19 Hz, CH], 31.27 (s, CH<sub>2</sub>), 29.91 (s, CH<sub>2</sub>), 29.48 [dd, *J*(PC) 19 Hz, *J*(RhC) 3.3 Hz, CH], 26.43 [d, *J*(PC) 7.9 Hz, CH<sub>2</sub>], 25.60 [d, *J*(PC) 8.4 Hz, CH<sub>2</sub>].

**Microanalysis:** C<sub>71</sub>H<sub>61</sub>BF<sub>24</sub>P<sub>3</sub>Rh requires: C, 54.77; H, 3.84. Found: C, 54.73; H, 3.78.

**[Rh(C<sub>6</sub>H<sub>5</sub>F)-η<sup>2</sup>-(P(C<sub>5</sub>H<sub>9</sub>)<sub>2</sub>(C<sub>5</sub>H<sub>7</sub>))][BAr<sup>F</sup><sub>4</sub>] (2)**

A mixture Rh(NBD)(P(C<sub>5</sub>H<sub>9</sub>)<sub>3</sub>)Cl (50.0 mg, 0.11 mmol) and Na(BAr<sup>F</sup><sub>4</sub>) (94.75 mg, 0.11 mmol) in C<sub>6</sub>H<sub>5</sub>F (5 mL) was stirred for 1 hour. The mixture was filtered and the solution was layered with pentanes. Slow diffusion gave **2** as pale yellow crystals (84 mg, 61%).

**<sup>1</sup>H NMR (400.13 MHz, C<sub>6</sub>H<sub>5</sub>F):** δ 8.29 (s, 8H, BAr<sup>F</sup><sub>4</sub>), 7.63 (s, 4H, BAr<sup>F</sup><sub>4</sub>), 6.07 (m, 4H, ArH), 5.45 (m, 1H, *p*ArH), 3.89 [d, *J* 3.0 Hz, 2H, HC=CH], 1.70-1.05 (m, 23H, CH/CH<sub>2</sub>).

**$^{31}\text{P}\{^1\text{H}\}$  NMR (161.98 MHz,  $\text{C}_6\text{H}_5\text{F}$ ):**  $\delta$  109.67 [dd,  $J(\text{RhP})$  178 Hz,  $J(\text{FP})$  3.9 Hz].

**Selected  $^{13}\text{C}\{^1\text{H}\}$  NMR (100.61,  $\text{C}_6\text{H}_5\text{F}$ ):**  $\delta$  145.55 [dt,  $J(\text{FC})$  275 Hz,  $J$  2.6 Hz,  $\text{C}_5\text{H}_5\text{CF}$ ], 103.32 [ddd,  $J(\text{FC})$  7.1 Hz,  $J$  2.7 Hz,  $J$  1.5 Hz,  $\text{C}_6\text{H}_5\text{F}$ ], 96.30 [ddd,  $J$  3.7 Hz,  $J$  2.7 Hz,  $J$  1.1 Hz,  $\text{C}_6\text{H}_5\text{F}$ ], 92.23 [dt,  $J(\text{FC})$  20 Hz,  $J$  2.0 Hz,  $\text{C}_6\text{H}_5\text{F}$ ], 65.04 [d,  $J(\text{RhC})$  16 Hz,  $\text{HC}=\text{CH}$ ], 36.15 [d,  $J(\text{PC})$  3.7 Hz,  $\text{CH}_2$ ], 35.20 [dd,  $J(\text{PC})$  26 Hz,  $J(\text{RhC})$  1.1 Hz,  $\text{CH}$ ], 32.22 (s,  $\text{CH}_2$ ), 30.08 [dd,  $J(\text{PC})$  29 Hz,  $J(\text{RhC})$  2.2 Hz,  $\text{CH}$ ], 30.06 (s,  $\text{CH}_2$ ), 27.23 [d,  $J(\text{PC})$  8.4 Hz,  $\text{CH}_2$ ], 26.32 [d,  $J(\text{PC})$  9.3 Hz,  $\text{CH}_2$ ].

**$[\text{Rh}(\text{C}_6\text{H}_6)-\eta^2\text{-(P(C}_5\text{H}_9)_2(\text{C}_5\text{H}_7))][\text{BAr}^{\text{F}}_4]$  (3)**

A mixture of benzene (0.2 ml,  $2.9 \times 10^{-3}$  mol),  $\text{Rh}(\text{NBD})(\text{P}(\text{C}_5\text{H}_9)_3)\text{Cl}$  (20.0 mg,  $4.2 \times 10^{-2}$  mmol) and  $\text{Na}(\text{BAr}^{\text{F}}_4)$  (37.9 mg,  $4.2 \times 10^{-2}$  mmol) in  $\text{CH}_2\text{Cl}_2$  (5 mL) was stirred for 1 hour. The mixture was filtered and the solvent was removed *in vacuo*. Diffusion of pentane into a solution of the residue in  $\text{CH}_2\text{Cl}_2$  gave **3** as pale yellow crystals (28 mg, 52%).

**$^1\text{H}$  NMR (400.13 MHz,  $\text{CD}_2\text{Cl}_2$ ):**  $\delta$  7.70 (s, 8H,  $\text{BAr}^{\text{F}}_4$ ), 7.55 (s, 4H,  $\text{BAr}^{\text{F}}_4$ ), 6.55 (s, 6H,  $\text{C}_6\text{H}_6$ ), 4.30 (d,  $J$  2.7 Hz, 2H,  $\text{HC}=\text{CH}$ ), 2.15-1.35 (m, 23H,  $\text{CH}/\text{CH}_2$ ).

**$^{31}\text{P}\{^1\text{H}\}$  NMR (161.98 MHz,  $\text{CD}_2\text{Cl}_2$ ):**  $\delta$  111.45 [d,  $J(\text{RhP})$  178 Hz].

**$^{13}\text{C}\{^1\text{H}\}$  NMR (100.61,  $\text{CD}_2\text{Cl}_2$ ):**  $\delta$  162.10 [q,  $J(\text{BC})$  50 Hz,  $\text{BAr}^{\text{F}}_4$ ], 135.14 (s,  $\text{BAr}^{\text{F}}_4$ ), 129.21 [qq,  $J(\text{FC})$  31 Hz,  $J(\text{BC})$  2.9 Hz,  $\text{BAr}^{\text{F}}_4$ ], 124.94 [q,  $J(\text{FC})$  272 Hz,  $\text{BAr}^{\text{F}}_4$ ], 117.81 (s,  $\text{BAr}^{\text{F}}_4$ ), 102.53 (s,  $\text{C}_6\text{H}_6$ ), 62.72 [d,  $J(\text{RhC})$  16 Hz,  $\text{HC}=\text{CH}$ ], 36.44 [d,  $J(\text{PC})$  4.0 Hz,  $\text{CH}_2$ ], 35.33 [d,  $J(\text{PC})$  26 Hz,  $\text{PCH}$ ], 32.55 (s,  $\text{CH}_2$ ), 30.33 (s,  $\text{CH}_2$ ), 30.15 [dd,  $J(\text{PC})$  28 Hz,  $J(\text{RhC})$  2.2 Hz,  $\text{PCH}$ ], 27.10 [d,  $J(\text{PC})$  8.8 Hz,  $\text{CH}_2$ ], 26.32 [d,  $J(\text{PC})$  9.5 Hz,  $\text{CH}_2$ ].

**Microanalysis:**  $\text{C}_{53}\text{H}_{43}\text{BF}_{24}\text{PRh}$  requires: C, 49.71; H, 3.38. Found: C, 49.58; H, 3.34.

**$[\text{Rh}-\eta^2\text{-(P(C}_5\text{H}_9)_2(\text{C}_5\text{H}_7))(\text{C}_4\text{H}_8\text{O})_2][\text{BAr}^{\text{F}}_4]$  (4)**

A solution of  $[\text{Rh}(\text{C}_6\text{H}_5\text{F})-\eta^2\text{-(P(C}_5\text{H}_9)_2(\text{C}_5\text{H}_7))][\text{BAr}^{\text{F}}_4]$  (30 mg,  $2.3 \times 10^{-5}$  mol) in THF (2 mL) was stirred for 1 hour. Diffusion of pentanes into the solution to gave **4** as yellow crystals (22 mg, 71%).

**$^1\text{H}$  NMR (400.13 MHz,  $\text{D}^8\text{-THF}$ ):**  $\delta$  7.79 (m, 8H,  $\text{BAr}^{\text{F}}_4$ ), 7.57 (s, 4H,  $\text{BAr}^{\text{F}}_4$ ), 3.66 (br s, 2H,  $\text{HC}=\text{CH}$ ), 2.29-0.83 (m, 23H,  $\text{CH}/\text{CH}_2$ ).

**$^{31}\text{P}\{^1\text{H}\}$  NMR (161.98 MHz,  $\text{D}^8\text{-THF}$ ):**  $\delta$  102.95 [d,  $J(\text{RhP})$  196 Hz].

**$^{13}\text{C}\{^1\text{H}\}$  NMR (100.61,  $\text{D}^8\text{-THF}$ ):**  $\delta$  162.77 [q,  $J(\text{BC})$  50 Hz,  $\text{BAr}^{\text{F}}_4$ ], 135.56 (s,  $\text{BAr}^{\text{F}}_4$ ), 129.97 [qq,  $J(\text{FC})$  31 Hz,  $J(\text{BC})$  2.9 Hz,  $\text{BAr}^{\text{F}}_4$ ], 125.48 [q,  $J(\text{FC})$  272 Hz,  $\text{BAr}^{\text{F}}_4$ ], 118.13 (m,  $\text{BAr}^{\text{F}}_4$ ), 63.80 [br d,  $J(\text{RhC})$  21 Hz,  $\text{HC}=\text{CH}$ ], 36.95 [d,  $J(\text{PC})$  3.1 Hz,  $\text{CH}_2$ ], 34.71 [d,  $J(\text{PC})$  25 Hz,  $\text{CH}$ ], 32.25 (s,

CH<sub>2</sub>), 31.59 [d, *J*(PC) 28 Hz, CH], 30.20 (s, CH<sub>2</sub>), 27.66 [d, *J*(PC) 8.2 Hz, CH<sub>2</sub>], 26.64 [d, *J*(PC) 8.8 Hz, CH<sub>2</sub>].

**[Rh- $\eta^2$ -(P(C<sub>5</sub>H<sub>9</sub>)<sub>2</sub>(C<sub>5</sub>H<sub>7</sub>))(CH<sub>3</sub>CN)<sub>2</sub>][BAr<sup>F</sup><sub>4</sub>] (5)**

A solution of CH<sub>3</sub>CN (25  $\mu$ L, 4.8 x 10<sup>-4</sup> mol) and [Rh(C<sub>6</sub>H<sub>5</sub>F)- $\eta^2$ -(P(C<sub>5</sub>H<sub>9</sub>)<sub>2</sub>(C<sub>5</sub>H<sub>7</sub>))][BAr<sup>F</sup><sub>4</sub>] (30 mg, 2.3 x 10<sup>-5</sup> mol) in C<sub>6</sub>H<sub>5</sub>F (2 mL) was stirred for 1 hour. The solution was layered with pentanes and left for 3 days, giving an orange oil. The oil was washed with pentane and dried *in vacuo* to give **5** as a yellow solid (27 mg, 91%).

**<sup>1</sup>H NMR (400.13 MHz, CD<sub>2</sub>Cl<sub>2</sub>, 220 K):**  $\delta$  7.71 (s, 8H, BAr<sup>F</sup><sub>4</sub>), 7.53 (s, 4H, BAr<sup>F</sup><sub>4</sub>), 4.06 (s, 2H, HC=CH), 2.29 (s, 3H, CH<sub>3</sub>), 2.12 (s, 3H, CH<sub>3</sub>), 2.01-1.20 (m, 23H, CH/CH<sub>2</sub>).

**<sup>31</sup>P{<sup>1</sup>H} NMR (161.98 MHz, CD<sub>2</sub>Cl<sub>2</sub>, 220 K):**  $\delta$  93.33 [d, *J*(RhP) 163 Hz].

**<sup>13</sup>C{<sup>1</sup>H} NMR (100.61, CD<sub>2</sub>Cl<sub>2</sub>, 220 K):**  $\delta$  161.36 [q, *J*(BC) 50 Hz, BAr<sup>F</sup><sub>4</sub>], 134.24 (s, BAr<sup>F</sup><sub>4</sub>), 128.22 [q, *J*(FC) 31 Hz, BAr<sup>F</sup><sub>4</sub>], 124.03 [q, *J*(FC) 273 Hz, BAr<sup>F</sup><sub>4</sub>], 123.17 (s, CN), 119.8 (d, *J* 5.5 Hz, CN), 117.15 (s, BAr<sup>F</sup><sub>4</sub>), 73.43 [d, *J*(RhC) 16 Hz, HC=CH], 36.34 [d, *J*(PC) 3.7 Hz, CH<sub>2</sub>], 31.42 (s, CH<sub>2</sub>), 31.27 [d, *J*(PC) 26 Hz, CH], 28.56 [d, *J*(PC) 27 Hz, CH], 28.41 (s, CH<sub>2</sub>), 26.01 [d, *J*(PC) 8.4 Hz, CH<sub>2</sub>], 25.67 [d, *J*(PC) 9.5 Hz, CH<sub>2</sub>], 3.40 (s, 2 x CH<sub>3</sub>).

**Procedure for the 1,4-addition of Phenylboronic acid to 2-cyclohexenone (I).**<sup>3</sup> To a solution of catalyst (**2**) (6.43 mg, 1 mol%) in THF (1 mL) and degassed water (0.1 mL) were added potassium hydroxide (2.8 mg, 10 mol%), 2-cyclohexenone (**I**) (0.048 mL, 0.5 mmol) and phenylboronic acid (122 mg, 1 mmol). The reaction mixture was heated for 16 h at 70°C. After cooling to room temperature the reaction was quenched with brine, extracted twice with EtOAc and the combined organic layers were washed with water, dried over MgSO<sub>4</sub>, filtered, and concentrated *in vacuo*. The residue was purified by silica gel chromatography using EtOAc/Petrol (1/10) as eluent to afford 3-phenylcyclohexanone (**II**)<sup>3</sup> as a colorless oil (81 mg, 93%): **<sup>1</sup>H NMR** (300 MHz, CDCl<sub>3</sub>):  $\delta$  1.61-1.82 (m, 2 H), 1.96-2.17 (m, 2 H), 2.23-2.57 (m, 4 H), 2.85-3.03 (m, 1 H), 7.09-7.19 (m, 3 H), 7.21-7.30 (m, 2 H). **<sup>13</sup>C NMR** (75 MHz, CDCl<sub>3</sub>):  $\delta$  25.5, 32.7, 41.1, 44.7, 48.9, 126.5, 126.6, 128.6, 144.3, 211.0.

**General procedure for the preparation of Phenylzinc Chloride solution in tetrahydrofuran:**<sup>4</sup> *t*-*n*-BuLi (26.7 mL, 1.5 M solution in pentane, 40 mmol) was added dropwise to a solution of iodobenzene (2.24 mL, 20 mmol) in THF (40 mL) at -78 °C. The reaction mixture was stirred 30 min at -78 °C, and then 15 min at room temperature. The phenyllithium solution was then added to a solution of ZnCl<sub>2</sub> (42.0 mL, 0.5 M solution in tetrahydrofuran, 21 mmol) at 0 °C and the resulting

solution was stirred for 30 min, warmed to room temperature and stirred for a further 2 hours. The pale yellow solution was concentrated *in vacuo* to 40 mL to afford a 0.5 M solution of phenylzinc chloride in tetrahydrofuran.

**General procedure for the 1,4-addition of Phenylzinc Chlorides.**<sup>4</sup> To a solution of catalyst (**2**) (6.43 mg, 1 mol%) in THF (1 mL) were added the enone (0.5 mmol), chlorotrimethylsilane (0.095 mL, 0.75 mmol) and phenylzinc chloride (1.5 mL, 0.5 M in tetrahydrofuran, 0.75 mmol) and the reaction mixture was stirred for 2 h. The reaction was quenched with brine, extracted twice with EtOAc and the combined organic layers were washed with water, dried over MgSO<sub>4</sub>, filtered, and concentrated *in vacuo*. The crude material was purified by silica gel chromatography using EtOAc/Petrol (1/10) as eluent to afford the 1,4-addition product.

**3-Phenylcyclohexanone (II)**<sup>3</sup> (77.5 mg, 89%) was obtained as a colorless oil by following the general procedure described above with 2-cyclohexenone (**I**) (0.048 mL, 0.5 mmol).

**Dimethyl 2-benzylsuccinate**<sup>5</sup> (111 mg, 94%) was obtained as a colorless oil by following the procedure described above with dimethyl itaconate (79 mg, 0.5 mmol). <sup>1</sup>H NMR (300 MHz, CDCl<sub>3</sub>): δ 2.30 (dd, J = 5.0 Hz, 17.0 Hz, 1H), 2.51-2.72 (m, 2 H), 2.92-3.11 (m, 2 H), 3.53 (s, 3 H), 3.58 (s, 3H), 7.01-7.24 (m, 5 H). <sup>13</sup>C NMR (75 MHz, CDCl<sub>3</sub>): δ 34.8, 37.7, 43.0, 51.7, 51.9, 126.6, 128.5, 128.9, 138.1, 172.2, 174.6.

**1,3,3-Triphenylpropan-1-one**<sup>6</sup> (89 mg, 85%) was obtained as a white powder by following the procedure described above with dimethyl itaconate (104 mg, 0.5 mmol). <sup>1</sup>H NMR (300 MHz, CDCl<sub>3</sub>): δ 3.63 (d, J = 7.3 Hz, 2H), 4.72 (t, J = 7.3 Hz, 1H), 7.02-7.20(m, 10 H), 7.27-7.37 (m, 2 H), 7.39-7.50 (m, 1 H), 7.80-7.91 (m, 2 H). <sup>13</sup>C NMR (75 MHz, CDCl<sub>3</sub>): δ 44.7, 45.9, 126.3, 127.8, 128.0, 128.2, 128.51, 128.54, 133.0, 137.0, 144.1, 198.0.

## References:

1. R. R. Schrock and J. A. Osborne, *J. Am. Chem. Soc.*, 1971, **93**, 2397.
2. R. H. Crabtree, A. Gautier, G. Giordano and T. Khan, *J. Organomet. Chem.*, 1977, **141**, 113.
3. Y. Takaya, M. Ogasawara, T. Hayashi, *J. Am. Chem. Soc.*, 1998, **120**, 5579.
4. R. Shintani, N. Tokunaga, H. Doi, T. Hayashi, *J. Am. Chem. Soc.*, 2004, **126**, 6240.
5. K. J. Wadsworth, F. K. Wood, C. J. Chapman and C. G. Frost, *Synlett*, 2004, 2022.
6. S. Oi, M. Moro, H. Ito, Y. Honma, S. Miyano and Y. Inoue, *Tetrahedron*, 2002, **58**, 91.
